# Supplementary material for: Insulin-induced Lipohypertrophy in Patients with Type 1 Diabetes Mellitus Treated with an Insulin Pump
Source: Hindawi journal article supplement (doi:10.1155/2022/9169296), 2022-01-24
Supplement: f1 [file 9169296.f1.pdf]

**Supplemental Table 1. The number of T1DM patients diagnosed with any LH lesion according to the diagnostic method.**

| <b>Region</b>     | <b>Visual assessment</b> | <b>Palpation</b> | <b>Physical examination<br/>(visual assessment and<br/>palpation)</b> | <b>Ultrasonography</b> | <b><i>P</i> *</b> |
|-------------------|--------------------------|------------------|-----------------------------------------------------------------------|------------------------|-------------------|
| All, n (%)        | 39 (49.4)                | 59 (74.7)        | 63 (79.7)                                                             | 75 (94.9)              | 0.008             |
| Abdomen, n (%)    | 34 (43)                  | 45 (57)          | 51 (64.6)                                                             | 59 (74.7)              | 0.23              |
| Arms, n (%)       | 3 (3.8)                  | 5 (6.3)          | 5 (6.3)                                                               | 12 (15.2)              | 0.14              |
| Buttocks, n (%)   | 2 (2.5)                  | 10 (12.7)        | 10 (12.7)                                                             | 20 (25.3)              | 0.07              |
| Tights, n (%)     | 2 (2.5)                  | 9 (11.4)         | 10 (12.7)                                                             | 15 (19)                | 0.38              |
| Subscapula, n (%) | -                        | -                | -                                                                     | 1 (1.3)                | 0.99              |

\*For the comparison of physical examination and ultrasonography.

**Supplemental Table 2. The comparison of the patients with less than 5 LH lesions and patients with 5 or more LH lesions on US.**

| Variable                        | Patients less than 5 LH lesions or without LH on US, (n = 38) | Patients with 5 or more LH lesions on US, (n = 41) | P*   |
|---------------------------------|---------------------------------------------------------------|----------------------------------------------------|------|
| Age, years                      | 29.3 ± 8.4                                                    | 29.5 ± 9.8                                         | 0.6  |
| Men, n (%)                      | 19 (50.0)                                                     | 21 (51.2)                                          | 0.99 |
| Diabetes duration, years        | 16.0 (8-20)                                                   | 13.0 (10.0-20.0)                                   | 0.99 |
| Time in CSII, years             | 8.2 ± 5.4                                                     | 8.7 ± 4.3                                          | 0.41 |
| HbA <sub>1c</sub> , %; mmol/mol | 7.0 (6.5-7.7)                                                 | 7.2 (6.9-8.7)                                      | 0.25 |
| BMI, kg/m <sup>2</sup>          | 42.1 (47.5-60.7)                                              | 55.2 (51.9-71.6)                                   |      |
|                                 | 23.7 ± 2.9                                                    | 25.3 ± 3.9                                         | 0.05 |
| MDI before insulin pump, years  | 4 (2-8)                                                       | 2 (2-7)                                            | 0.60 |
| Hypothyroidism, n (%)           | 6 (15.8)                                                      | 8 (19.5)                                           | 0.89 |

CSII, continuous subcutaneous insulin infusion; HbA<sub>1c</sub>, hemoglobin A<sub>1c</sub>; BMI, body mass index; MDI, multiply insulin injection

\*For the comparison of patients with LH number < 5 and ≥ 5.

**Supplemental Table 3. The comparison of the number of any lipohypertrophic (LH) lesions according to the diagnostic method in type 1 diabetes (T1DM) patients (n=79).**

| <b>Region</b> | <b>Visual assessment</b> | <b>Palpation</b> | <b>Physical examination (visual assessment and palpation)</b> | <b>Ultrasonography</b> | <b><i>P</i>*</b> |
|---------------|--------------------------|------------------|---------------------------------------------------------------|------------------------|------------------|
| All, n        | 72                       | 134              | 152                                                           | 372                    | <0.0001          |
| Abdomen, n    | 62                       | 92               | 107                                                           | 189                    | 0.004            |
| Arms, n       | 4                        | 8                | 8                                                             | 31                     | 0.06             |
| Buttocks, n   | 3                        | 19               | 19                                                            | 69                     | 0.01             |
| Tights, n     | 3                        | 19               | 21                                                            | 78                     | 0.17             |
| Subscapula, n | -                        | -                | -                                                             | 5                      | 0.32             |

\*For the comparison of physical examination and ultrasonography.

**Supplemental Table 4. The comparison of the number of LH lesions and LH severity score according to the type of infusion set used by T1DM patients.**

|                              | <b>Patients using Teflon cannulas,<br/>n=71*</b> | <b>Patients using steel cannulas, n=7</b> | <b><i>P**</i></b> |
|------------------------------|--------------------------------------------------|-------------------------------------------|-------------------|
| LH number, mean ± SD         | 4.8 ± 3.4                                        | 4.9 ± 1.8                                 | 0.64              |
| LH severity score, mean ± SD | 5.0 ± 2.0                                        | 5.3 ± 1.0                                 | 0.78              |

\* Including three patients who used Teflon and steel cannula interchangeably. The information about one patient is missing.

\*\* For the comparison of patients using Teflon versus steel cannulas.

**Supplemental Table 5. The comparison of the number of LH lesions and LH severity score according to the insulin used by T1DM patients.**

|                              | <b>Patients treated with insulin lispro, n=52</b> | <b>Patients treated with insulin aspart, n=21</b> | <b>Patients treated with insulin glulisine, n=6</b> | <b><i>P*</i></b> |
|------------------------------|---------------------------------------------------|---------------------------------------------------|-----------------------------------------------------|------------------|
| LH number, mean ± SD         | 4.0 ± 2.7                                         | 4.7 ± 3.6                                         | 5.0 ± 3.5                                           | 0.47             |
| LH severity score, mean ± SD | 4.5 ± 1.9                                         | 5.0 ± 2.5                                         | 5.1 ± 1.9                                           | 0.47             |

\*For the comparison of patients using insulin lispro versus insulin aspart versus insulin glulisine.
